# Supplementary material for: Understanding the mechanism of low temperature deactivation of Cu/SAPO-34 exposed to various amounts of water vapor in the NH3-SCR reaction
Source: Royal Society of Chemistry journal article supplement (doi:10.1039/c9cy00240e), 2019-01-01
Supplement: c9cy00240e1.pdf [file c9cy00240e1.pdf]

# Electronic supplementary information (ESI)

## Understanding the Mechanism of Low Temperature Deactivation of Cu/SAPO-34 Exposed to Various Amount of Water Vapor in NH<sub>3</sub>-SCR reaction

Jungwon Woo<sup>a\*</sup>, Diana Bernin<sup>a</sup>, Homayoun Ahari<sup>b</sup>, Mark Shost<sup>b</sup>, Michael Zammit<sup>b</sup> and Louise Olsson<sup>a\*</sup>

<sup>a</sup>*Chemical Engineering, Competence Centre for Catalysis, Chalmers University of Technology, 412 96  
Gothenburg, Sweden*

<sup>b</sup>*FCA USA LLC, 800 Chrysler Drive, Auburn Hills, MI 48326-2766, USA*

\*[jungwon@chalmers.se](mailto:jungwon@chalmers.se); [louise.olsson@chalmers.se](mailto:louise.olsson@chalmers.se)

### Supplementary figures

**Figure S1.** NO-DRIFTS spectra of a) 10W-Cu/SAPO-34(MO), b) 10W-Cu/SAPO-34(TEA), c) 10W-Cu/SAPO-34(TEAOH) d) 55W-Cu/SAPO-34(MO), e) 55W-Cu/SAPO-34(TEA), f) 55W-Cu/SAPO-34(TEAOH).

**Figure S2.** H<sub>2</sub>-profiles of 10W and 55W-Cu/SAPO-34(MO, TEA, TEAOH).

**Figure S3.** NO<sub>x</sub> conversion as a function of temperature over Cu/SAPO-34(MO, TEA, TEAOH); reaction conditions: 400 ppm NH<sub>3</sub>, 400 ppm NO, 8% O<sub>2</sub>, 5% H<sub>2</sub>O; GHSV ~24264 h<sup>-1</sup>.

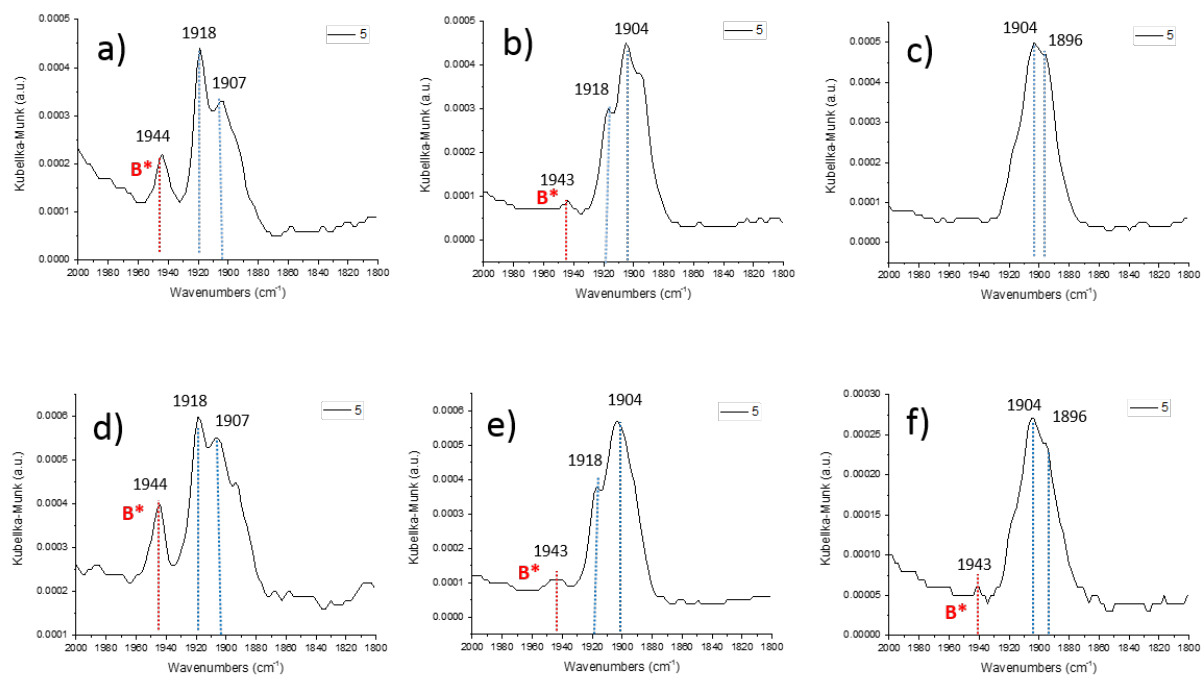

**Figure S1.** NO-DRIFTS spectra of a) 10W-Cu/SAPO-34(MO), b) 10W-Cu/SAPO-34(TEA), c) 10W-Cu/SAPO-34(TEAOH) d) 55W-Cu/SAPO-34(MO), e) 55W-Cu/SAPO-34(TEA), f) 55W-Cu/SAPO-34(TEAOH).

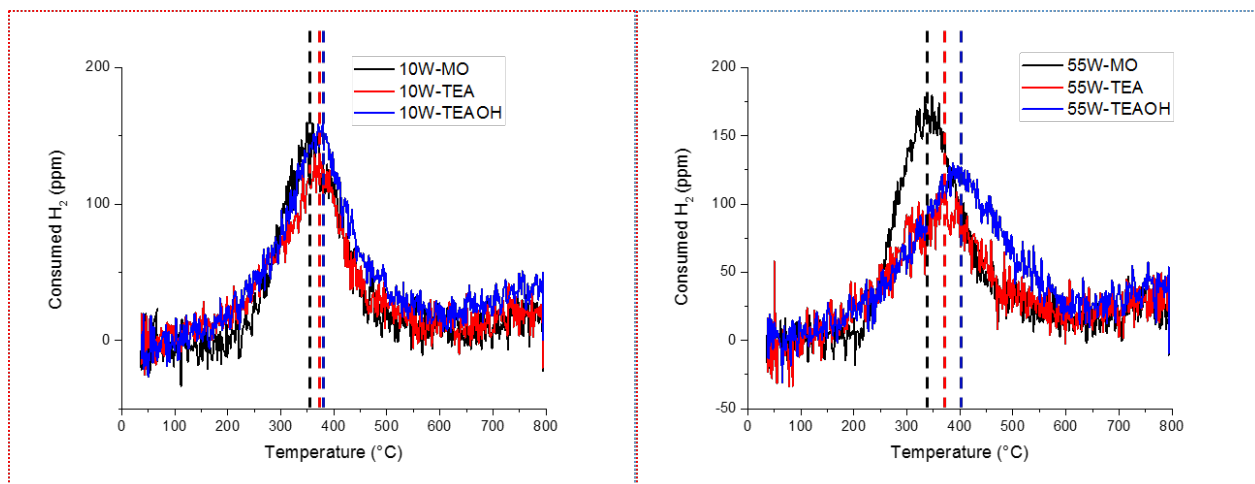

**Figure S2.** H<sub>2</sub>-TPR profiles of 10W and 55W-Cu/SAPO-34(MO, TEA, TEOH).

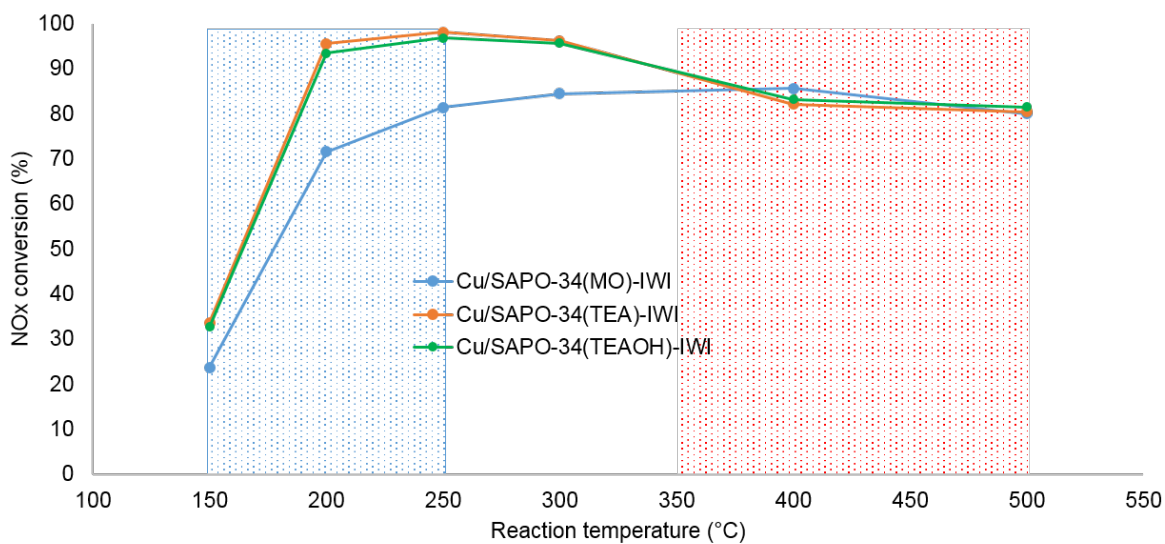

**Figure S3.** NO<sub>x</sub> conversion as a function of temperature over Cu/SAPO-34(MO, TEA, TEOH); reaction conditions: 400 ppm NH<sub>3</sub>, 400 ppm NO, 8% O<sub>2</sub>, 5% H<sub>2</sub>O; GHSV ~24264 h<sup>-1</sup>.

## Supplementary tables

**Table S1.** BET and micropore surface area, pore volume, and average pore diameter of F-, 10W-, 55W-Cu/SAPO-34(MO, TEA, TEAOH).

**Table S2.** Chemical composition of F, 10W, 55W-Cu/SAPO-34(MO, TEA, TEAOH) determined by ICP-SFMS.

**Table S1.** BET and micropore surface area, pore volume, and average pore diameter of F, 10W, 55W-Cu/SAPO-34(MO, TEA, TEOH)

| Catalyst             | S <sub>BET</sub> (m <sup>2</sup> /g) | Pore volume (cm <sup>3</sup> /g) | Average pore diameter (Å) |
|----------------------|--------------------------------------|----------------------------------|---------------------------|
| F-Cu/SAPO-34(MO)     | 577                                  | 0.28                             | 19.1                      |
| 10W-Cu/SAPO-34(MO)   | 401                                  | 0.21                             | 21                        |
| 55W-Cu/SAPO-34(MO)   | 602                                  | 0.31                             | 20.3                      |
| F-Cu/SAPO-34(TEA)    | 598                                  | 0.29                             | 19.4                      |
| 10W-Cu/SAPO-34(TEA)  | 457                                  | 0.25                             | 22                        |
| 55W-Cu/SAPO-34(TEA)  | 562                                  | 0.29                             | 20.7                      |
| F-Cu/SAPO-34(TEOH)   | 592                                  | 0.36                             | 24.6                      |
| 10W-Cu/SAPO-34(TEOH) | 438                                  | 0.29                             | 26.2                      |
| 55W-Cu/SAPO-34(TEOH) | 617                                  | 0.4                              | 25.8                      |

**Table S2.** Chemical composition of F, 10W, 55W-Cu/SAPO-34(MO, TEA, TEOH) determined by ICP-SFMS. Note that 10W and 55W samples are crushed monoliths that contain significant amount of cordierite.

| Catalyst             | Cu(wt.%) | Si(wt.%) | Al(wt.%) | P(wt.%) |
|----------------------|----------|----------|----------|---------|
| F-Cu/SAPO-34(MO)     | 1.90     | 5.6      | 21.7     | 15.8    |
| F-Cu/SAPO-34(TEA)    | 1.91     | 4.2      | 19.4     | 16.3    |
| F-Cu/SAPO-34(TEOH)   | 1.85     | 5.4      | 19.8     | 16.2    |
| 10W-Cu/SAPO-34(MO)   | 0.30     | 18.5     | 17.6     | 2.4     |
| 10W-Cu/SAPO-34(TEA)  | 0.30     | 16.7     | 17.1     | 2.7     |
| 10W-Cu/SAPO-34(TEOH) | 0.30     | 18.1     | 18.3     | 2.7     |
| 55W-Cu/SAPO-34(MO)   | 0.30     | 18.2     | 18.5     | 2.4     |
| 55W-Cu/SAPO-34(TEA)  | 0.32     | 16.7     | 17.7     | 3.1     |
| 55W-Cu/SAPO-34(TEOH) | 0.30     | 15.5     | 15.9     | 2.4     |
